# Supplementary material for: An empirical survey of data augmentation for time series classification with neural networks
Source: PubMed Central journal article supplement (PMC8282049; doi:10.1371/journal.pone.0254841), 2021-07-15
Supplement: pone.0254841.s001.pdf [file pone.0254841.s001.pdf]

# An empirical survey of data augmentation for time series classification with neural networks

Brian Kenji Iwana<sup>1\*</sup>, Seiichi Uchida<sup>1</sup>

<sup>1</sup> Department of Advanced Information Technology, Kyushu University, Fukuoka, Japan

\* iwana@ait.kyushu-u.ac.jp

**S1 Table. Details of the Datasets**

| Name                         | Type      | # Classes | # Time Steps | # Train | # Test |
|------------------------------|-----------|-----------|--------------|---------|--------|
| ACSF1                        | Device    | 10        | 1460         | 100     | 100    |
| Adiac                        | Image     | 37        | 176          | 390     | 391    |
| AllGestureWiioteX            | Sensor    | 10        | ≤500         | 300     | 700    |
| AllGestureWiioteY            | Sensor    | 10        | ≤500         | 300     | 700    |
| AllGestureWiioteZ            | Sensor    | 10        | ≤500         | 300     | 700    |
| ArrowHead                    | Image     | 3         | 251          | 36      | 175    |
| Beef                         | Spectro   | 5         | 470          | 30      | 30     |
| BeetleFly                    | Image     | 2         | 512          | 20      | 20     |
| BirdChicken                  | Image     | 2         | 512          | 20      | 20     |
| BME                          | Simulated | 3         | 128          | 30      | 150    |
| Car                          | Sensor    | 4         | 577          | 60      | 60     |
| CBF                          | Simulated | 3         | 128          | 30      | 900    |
| Chinatown                    | Traffic   | 2         | 24           | 20      | 343    |
| ChlorineConcentration        | Sensor    | 3         | 166          | 467     | 3840   |
| CinCECGTorso                 | Sensor    | 4         | 1639         | 40      | 1380   |
| Coffee                       | Spectro   | 2         | 286          | 28      | 28     |
| Computers                    | Device    | 2         | 720          | 250     | 250    |
| CricketX                     | Motion    | 12        | 300          | 390     | 390    |
| CricketY                     | Motion    | 12        | 300          | 390     | 390    |
| CricketZ                     | Motion    | 12        | 300          | 390     | 390    |
| Crop                         | Image     | 24        | 46           | 7200    | 16800  |
| DiatomSizeReduction          | Image     | 4         | 345          | 16      | 306    |
| DistalPhalanxOutlineAgeGroup | Image     | 3         | 80           | 400     | 139    |
| DistalPhalanxOutlineCorrect  | Image     | 2         | 80           | 600     | 276    |
| DistalPhalanxTW              | Image     | 6         | 80           | 400     | 139    |
| DodgerLoopDay                | Sensor    | 7         | 288          | 78      | 80     |
| DodgerLoopGame               | Sensor    | 2         | 288          | 20      | 138    |
| DodgerLoopWeekend            | Sensor    | 2         | 288          | 20      | 138    |
| Earthquakes                  | Sensor    | 2         | 512          | 322     | 139    |
| ECG200                       | ECG       | 2         | 96           | 100     | 100    |
| ECG5000                      | ECG       | 5         | 140          | 500     | 4500   |
| ECGFiveDays                  | ECG       | 2         | 136          | 23      | 861    |

| Name                         | Type       | # Classes | # Time Steps | # Train | # Test |
|------------------------------|------------|-----------|--------------|---------|--------|
| ElectricDevices              | Device     | 7         | 96           | 8926    | 7711   |
| EOGHorizontalSignal          | EOG        | 12        | 1250         | 362     | 362    |
| EOGVerticalSignal            | EOG        | 12        | 1250         | 362     | 362    |
| EthanolLevel                 | Spectro    | 4         | 1751         | 504     | 500    |
| FaceAll                      | Image      | 14        | 131          | 560     | 1690   |
| FaceFour                     | Image      | 4         | 350          | 24      | 88     |
| FacesUCR                     | Image      | 14        | 131          | 200     | 2050   |
| FiftyWords                   | Image      | 50        | 270          | 450     | 455    |
| Fish                         | Image      | 7         | 463          | 175     | 175    |
| FordA                        | Sensor     | 2         | 500          | 3601    | 1320   |
| FordB                        | Sensor     | 2         | 500          | 3636    | 810    |
| FreezerRegularTrain          | Sensor     | 2         | 301          | 150     | 2850   |
| FreezerSmallTrain            | Sensor     | 2         | 301          | 28      | 2850   |
| Fungi                        | HRM        | 18        | 201          | 18      | 186    |
| GestureMidAirD1              | Trajectory | 26        | ≤360         | 208     | 130    |
| GestureMidAirD2              | Trajectory | 26        | ≤360         | 208     | 130    |
| GestureMidAirD3              | Trajectory | 26        | ≤360         | 208     | 130    |
| GesturePebbleZ1              | Sensor     | 6         | ≤455         | 132     | 172    |
| GesturePebbleZ2              | Sensor     | 6         | ≤455         | 146     | 158    |
| GunPoint                     | Motion     | 2         | 150          | 50      | 150    |
| GunPointAgeSpan              | Motion     | 2         | 150          | 135     | 316    |
| GunPointMaleVersusFemale     | Motion     | 2         | 150          | 135     | 316    |
| GunPointOldVersusYoung       | Motion     | 2         | 150          | 136     | 315    |
| Ham                          | Spectro    | 2         | 431          | 109     | 105    |
| HandOutlines                 | Image      | 2         | 2709         | 1000    | 370    |
| Haptics                      | Motion     | 5         | 1092         | 155     | 308    |
| Herring                      | Image      | 2         | 512          | 64      | 64     |
| HouseTwenty                  | Device     | 2         | 2000         | 40      | 119    |
| InlineSkate                  | Motion     | 7         | 1882         | 100     | 550    |
| InsectEPGRegularTrain        | EPG        | 3         | 601          | 62      | 249    |
| InsectEPGSmallTrain          | EPG        | 3         | 601          | 17      | 249    |
| InsectWingbeatSound          | Sensor     | 11        | 256          | 220     | 1980   |
| ItalyPowerDemand             | Sensor     | 2         | 24           | 67      | 1029   |
| LargeKitchenAppliances       | Device     | 3         | 720          | 375     | 375    |
| Lightning2                   | Sensor     | 2         | 637          | 60      | 61     |
| Lightning7                   | Sensor     | 7         | 319          | 70      | 73     |
| Mallat                       | Simulated  | 8         | 1024         | 55      | 2345   |
| Meat                         | Spectro    | 3         | 448          | 60      | 60     |
| MedicalImages                | Image      | 10        | 99           | 381     | 760    |
| MelbournePedestrian          | Traffic    | 10        | 24           | 1194    | 2439   |
| MiddlePhalanxOutlineAgeGroup | Image      | 3         | 80           | 400     | 154    |
| MiddlePhalanxOutlineCorrect  | Image      | 2         | 80           | 600     | 291    |
| MiddlePhalanxTW              | Image      | 6         | 80           | 399     | 154    |
| MixedShapesRegularTrain      | Image      | 5         | 1024         | 500     | 2425   |
| MixedShapesSmallTrain        | Image      | 5         | 1024         | 100     | 2425   |
| MoteStrain                   | Sensor     | 2         | 84           | 20      | 1252   |
| NonInvasiveFetalECGThorax1   | ECG        | 42        | 750          | 1800    | 1965   |
| NonInvasiveFetalECGThorax2   | ECG        | 42        | 750          | 1800    | 1965   |
| OliveOil                     | Spectro    | 4         | 570          | 30      | 30     |
| OSULeaf                      | Image      | 6         | 427          | 200     | 242    |
| PhalangesOutlinesCorrect     | Image      | 2         | 80           | 1800    | 858    |
| Phoneme                      | Sensor     | 39        | 1024         | 214     | 1896   |

| Name                           | Type         | # Classes | # Time Steps | # Train | # Test |
|--------------------------------|--------------|-----------|--------------|---------|--------|
| PickupGestureWiimoteZ          | Sensor       | 10        | ≤361         | 50      | 50     |
| PigAirwayPressure              | Hemodynamics | 52        | 2000         | 104     | 208    |
| PigArtPressure                 | Hemodynamics | 52        | 2000         | 104     | 208    |
| PigCVP                         | Hemodynamics | 52        | 2000         | 104     | 208    |
| PLAID                          | Device       | 11        | ≤1344        | 537     | 537    |
| Plane                          | Sensor       | 7         | 144          | 105     | 105    |
| PowerCons                      | Power        | 2         | 144          | 180     | 180    |
| ProximalPhalanxOutlineAgeGroup | Image        | 3         | 80           | 400     | 205    |
| ProximalPhalanxOutlineCorrect  | Image        | 2         | 80           | 600     | 291    |
| ProximalPhalanxTW              | Image        | 6         | 80           | 400     | 205    |
| RefrigerationDevices           | Device       | 3         | 720          | 375     | 375    |
| Rock                           | Spectrum     | 4         | 2844         | 20      | 50     |
| ScreenType                     | Device       | 3         | 720          | 375     | 375    |
| SemgHandGenderCh2              | Spectrum     | 2         | 1500         | 300     | 600    |
| SemgHandMovementCh2            | Spectrum     | 6         | 1500         | 450     | 450    |
| SemgHandSubjectCh2             | Spectrum     | 5         | 1500         | 450     | 450    |
| ShakeGestureWiimoteZ           | Sensor       | 10        | ≤19          | 50      | 50     |
| ShapeletSim                    | Simulated    | 2         | 500          | 20      | 180    |
| ShapesAll                      | Image        | 60        | 512          | 600     | 600    |
| SmallKitchenAppliances         | Device       | 3         | 720          | 375     | 375    |
| SmoothSubspace                 | Simulated    | 3         | 15           | 150     | 150    |
| SonyAIBORobotSurface1          | Sensor       | 2         | 70           | 20      | 601    |
| SonyAIBORobotSurface2          | Sensor       | 2         | 65           | 27      | 953    |
| StarLightCurves                | Sensor       | 3         | 1024         | 1000    | 8236   |
| Strawberry                     | Spectro      | 2         | 235          | 613     | 370    |
| SwedishLeaf                    | Image        | 15        | 128          | 500     | 625    |
| Symbols                        | Image        | 6         | 398          | 25      | 995    |
| SyntheticControl               | Simulated    | 6         | 60           | 300     | 300    |
| ToeSegmentation1               | Motion       | 2         | 277          | 40      | 228    |
| ToeSegmentation2               | Motion       | 2         | 343          | 36      | 130    |
| Trace                          | Sensor       | 4         | 275          | 100     | 100    |
| TwoLeadECG                     | ECG          | 2         | 82           | 23      | 1139   |
| TwoPatterns                    | Simulated    | 4         | 128          | 1000    | 4000   |
| UMD                            | Simulated    | 3         | 150          | 36      | 144    |
| UWaveGestureLibraryAll         | Motion       | 8         | 945          | 896     | 3582   |
| UWaveGestureLibraryX           | Motion       | 8         | 315          | 896     | 3582   |
| UWaveGestureLibraryY           | Motion       | 8         | 315          | 896     | 3582   |
| UWaveGestureLibraryZ           | Motion       | 8         | 315          | 896     | 3582   |
| Wafer                          | Sensor       | 2         | 152          | 1000    | 6164   |
| Wine                           | Spectro      | 2         | 234          | 57      | 54     |
| WordSynonyms                   | Image        | 25        | 270          | 267     | 638    |
| Worms                          | Motion       | 5         | 900          | 181     | 77     |
| WormsTwoClass                  | Motion       | 2         | 900          | 181     | 77     |
| Yoga                           | Image        | 2         | 426          | 300     | 3000   |
