# Supplementary material for: An empirical survey of data augmentation for time series classification with neural networks
Source: PubMed Central journal article supplement (PMC8282049; doi:10.1371/journal.pone.0254841), 2021-07-15

MLP

VGG

ResNet

LSTM

BLSTM

LSTM-FCN

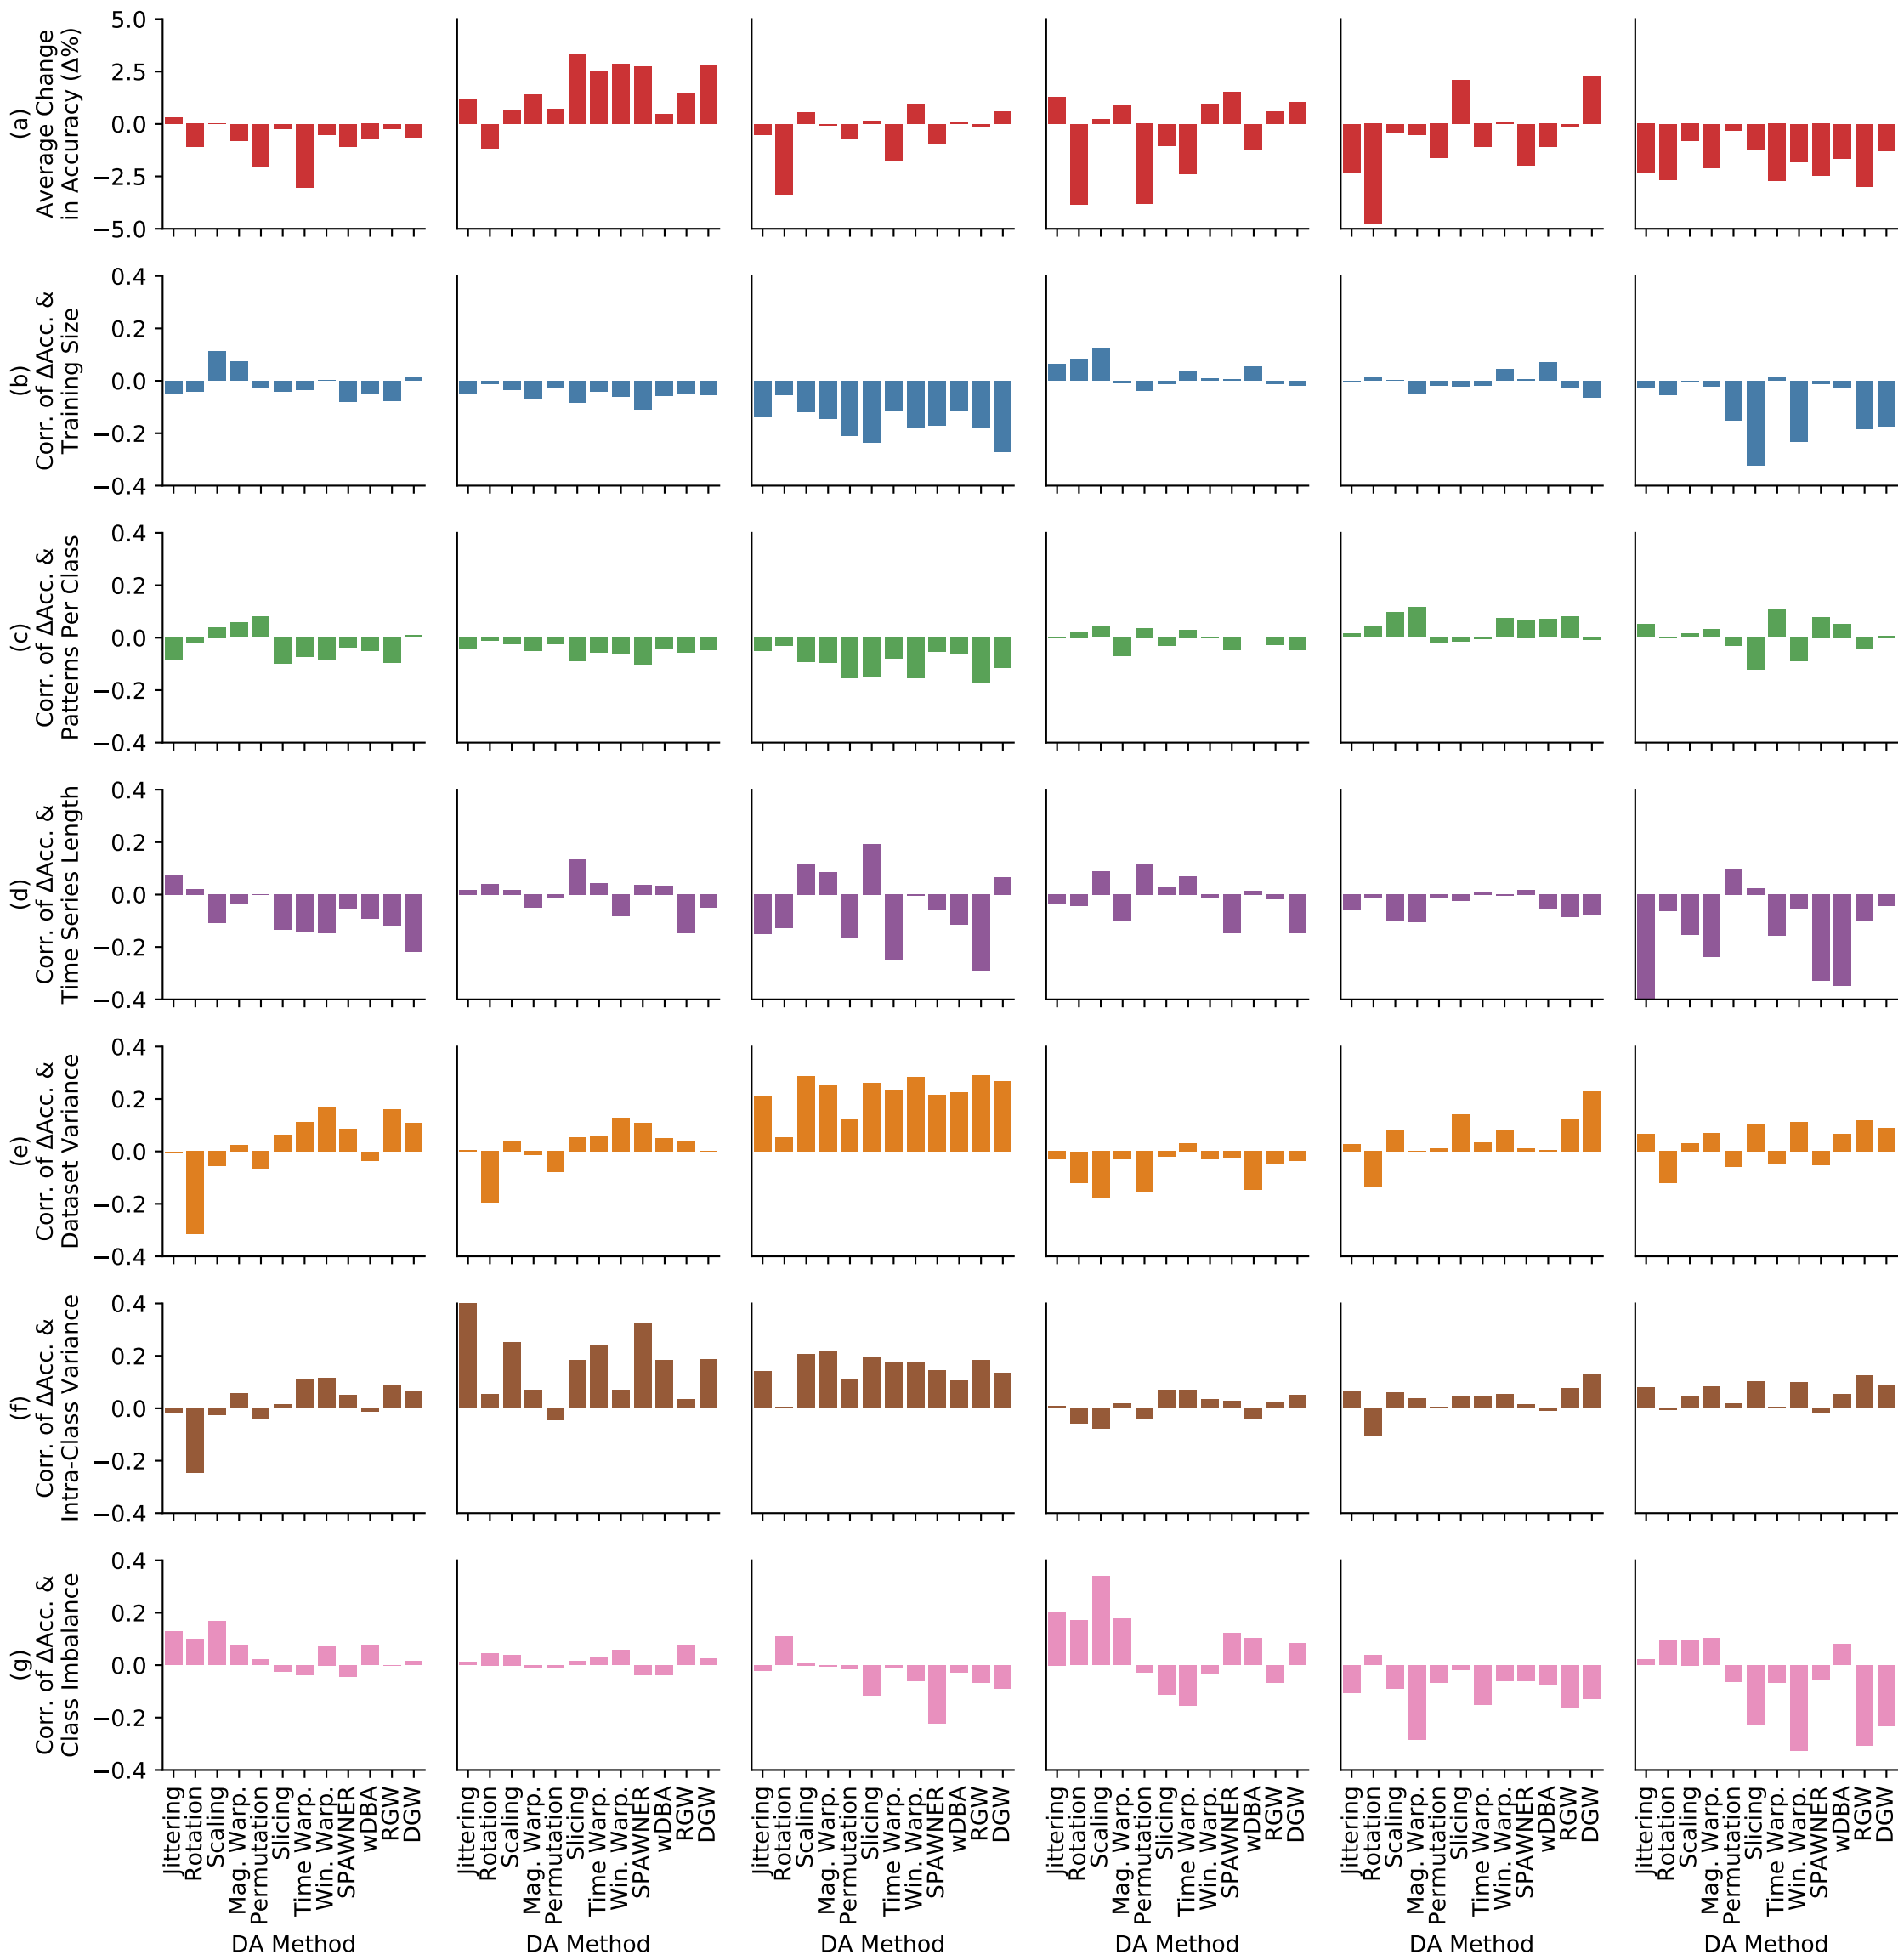

Supplement: pone.0254841.s002.pdf [file pone.0254841.s002.pdf]
